# Supplementary material for: Financial Toxicity Characteristics and Influencing Factors of Inflammatory Bowel Disease Patients - Latent Profile Analysis
Source: Research Square preprint supplement (doi:10.21203/rs.3.rs-7703836/v1), 2025-12-30
Supplement: Supplementary file 1 [file dffbe10c3ebd2fb8f02f4cd9.docx]

**Ethics Committee of Clinical Medical Research**

**First Affiliated Hospital of Anhui Medical University**

**Ethics Review Approval Document**

| Approval document number | Anhui Medical University First Affiliated Hospital Ethical Review One Fast One PJ2022-14-55 | | |
| --- | --- | --- | --- |
| Project Name | The impact of motivational interviewing interventions on the psychological status and quality of life of adolescents and young adults with IBD. | | |
| Project Source | Research Office | | |
| Research Unit | Gastroenterology | | |
| Main Researcher | Cao Hui | | |
| Review Category | Preliminary review  (research project) | Review method | Quick review |
| Review Date | November 30, 2022 | Review location | Second conference room of the administration building |
| Review Committee | Liu Rongyu, Wu Huaidong | | |
| Approval  Document | 1.Initial review application  2. Clinical trial protocol (Version number: 1.0; Version date: November 21, 2022)  3. Informed consent form (Version number: 1.0; Version date: November 21, 2022)  4. Subject recruitment materials (Version number: 1.0; Version date: November 21, 2022)  5. Case report form  6. Investigator's manual  7. Curriculum vitae of the principal investigator  8. Funding source of the project  9. Application form for the registration of the hospital's staff research ethics project  10. Commitment letter from the ethics review applicant  11. Declaration of conflicts of interest of the investigator | | |
| Review comments | | | |
| This ethics committee has reviewed and agrees to proceed with the research in accordance with the approved documents, including the 'Regulations on Ethical Review of Biomedical Research Involving Humans', CFDA 'Good Clinical Practice for Drug Clinical Trials (2003)', WMA 'Declaration of Helsinki', and CIOMS 'International Ethical Guidelines for Biomedical Research Involving Human Subjects'.   Please follow GCP principles and perform clinical research in compliance with ethics committee-approved documentation, while protecting the subjects' health and rights.  Before the research may begin, the applicant must first register the clinical trial.  If the primary investigator changes throughout the research, or if the approved materials change, the applicant must submit an  amendment review application.  If a major adverse event occurs, the applicant should file a report as soon as possible. | | | |

Page 1 of 2

Ethics Review Approval Document AF/SC-08/03.0

| Please submit the research progress report one month before the deadline, in accordance with the ethics committee's annual/periodic follow  -up review frequency; the sponsor should provide a summary report of each center's research progress to the ethics committee of the leading unit: If  any circumstances arise that could have a substantial impact on the trial's conduct or raise the danger to participants, the sponsor should promptly  submit a written report to the ethical committee.  If the study includes subjects who do not meet the inclusion or exclusion criteria, do not withdraw subjects from the study in accordance with  the criteria for terminating the trial, administer incorrect treatment or dosage, or give prohibited concomitant medications, among other situations that  do not comply with the study protocol; or if there are circumstances that may negatively impact the rights/health of subjects and the scientific validity  of the research, in violation of Good Clinical Practice (GCP) principles, the sponsor/monitor/researcher should submit a report of protocol violations.  If the sponsor pauses or terminates the clinical trial prematurely, please provide a suspension/termination report as soon as possible.  When the clinical research is completed, the sponsor should submit a completion report. | |
| --- | --- |
| Annual/Periodic Tracking Review Frequency | Please submit the annual/periodic follow-up review one month before November 30, 2023. |
| Validity period | December 1, 2022 ~ November 30, 2024 |
| Contact person and phone number | Ge Ying 0551-62922017 |
| Chairman's signature | 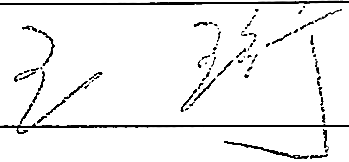 |
| Ethics Committee | 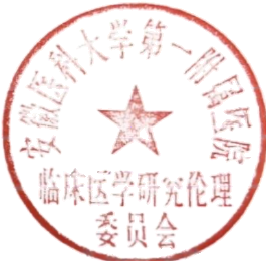(盖章) |
| Date | December 1, 2022 |

According to the People's Republic of China's Drug Administration Law, the General Office of the State Council's Interim Measures for the Management of Human Genetic Resources, and other relevant laws and regulations, experimental data and biological sample resources used in projects approved by this ethics committee are strictly prohibited from leaving the country. This ethical committee must seek and approve approval from the Chinese Office of Human Genetic Resources Management before experimental data and biological samples can leave the country.

Page 2 of 2
